# Supplementary material for: Responsive polyprodrug for anticancer nanocarriers
Source: Royal Society of Chemistry journal article supplement (doi:10.1039/d2py00427e), 2022-01-01
Supplement: d2py00427e1.pdf [file d2py00427e1.pdf]

## Electronic Supporting Information

### Responsive polyprodrug for anticancer nanocarriers

Arjaree Jobdeedamrong,<sup>a</sup> Man Theerasilp,<sup>a</sup> Nutthanit Thumrongsiri,<sup>b</sup> Paweena Dana,<sup>b</sup> Nattika Saengkrit,<sup>b</sup> Daniel Crespy<sup>a,\*</sup>

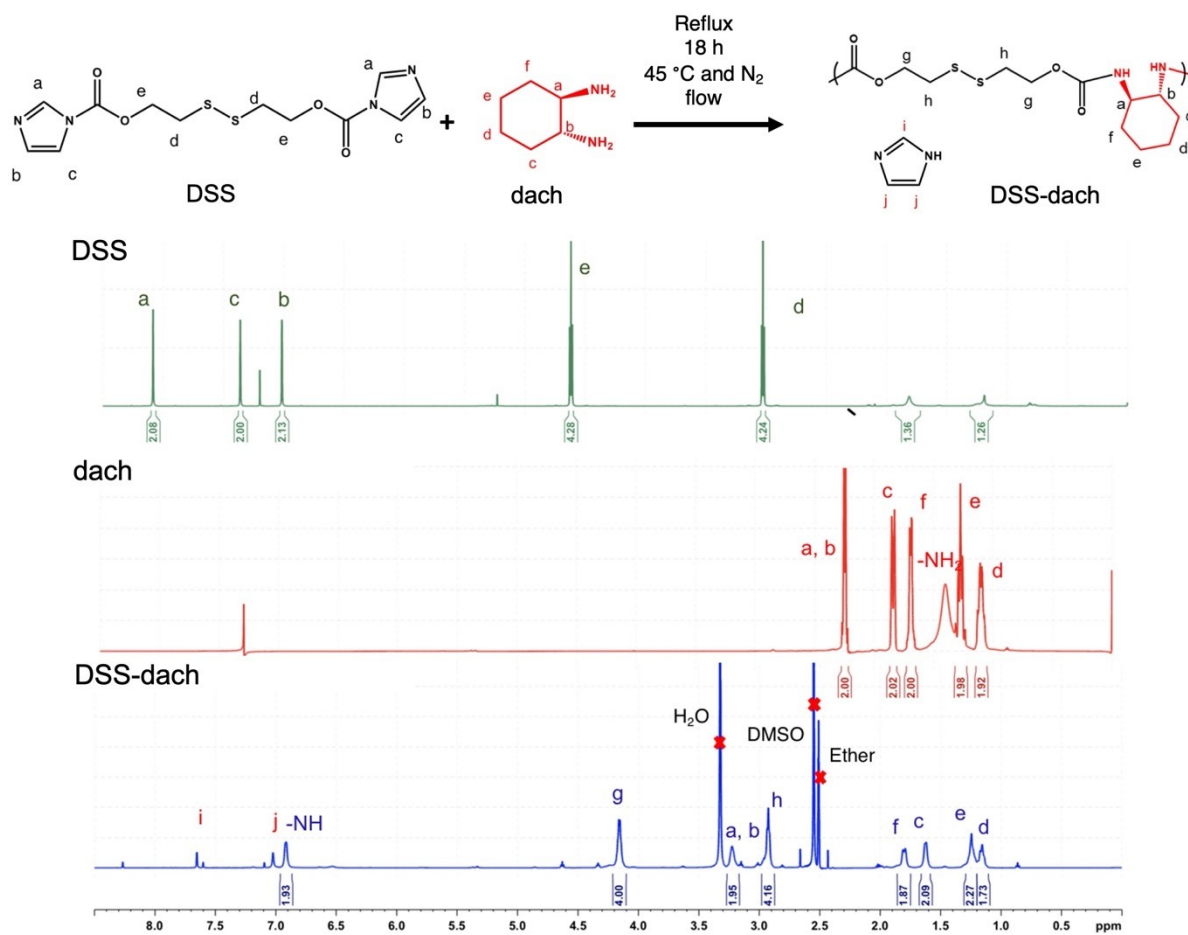

Fig. S1. <sup>1</sup>H NMR spectrum of DSS-dach in DMSO-d<sub>6</sub>.

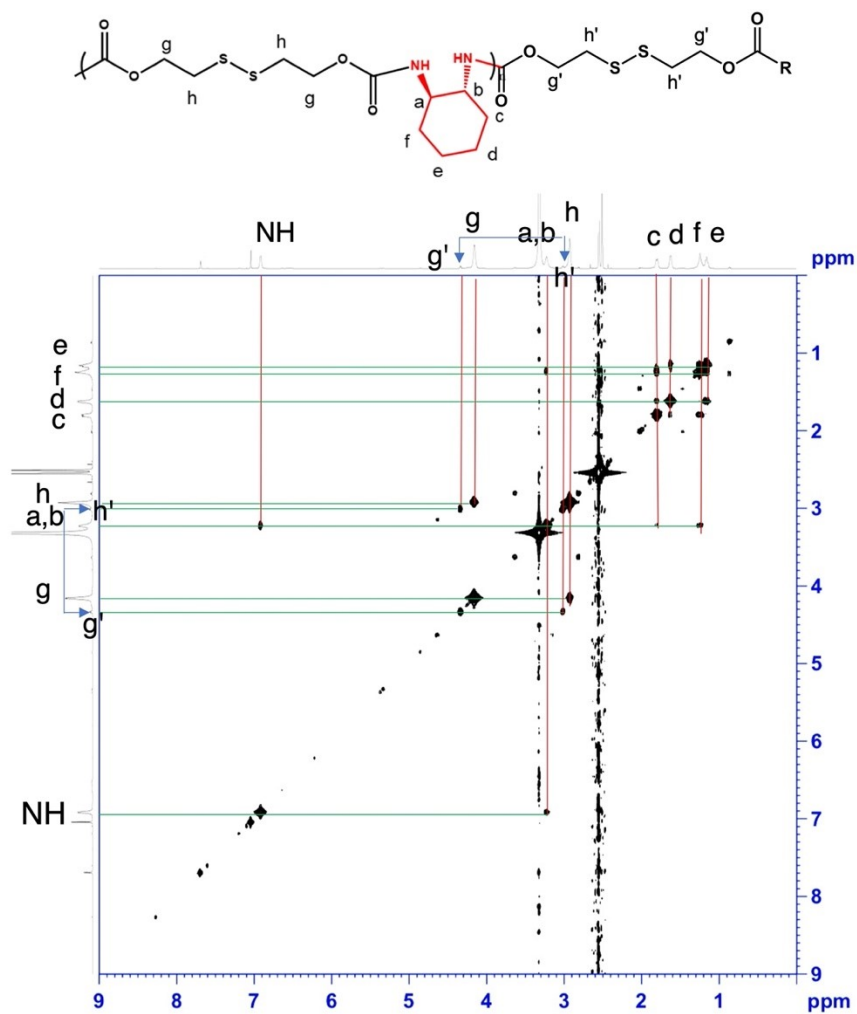

Fig. S2. 2D NMR-COSY spectrum of DSS-dach in DMSO-d<sub>6</sub>.

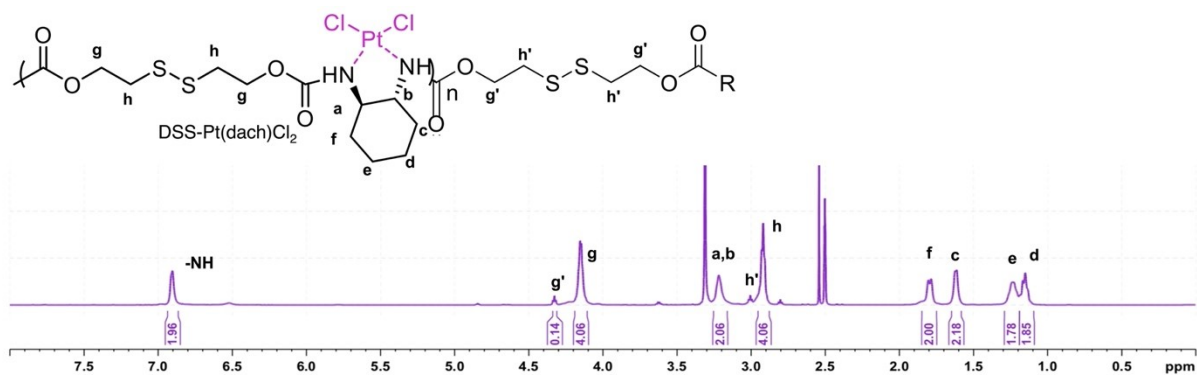

Fig. S3. <sup>1</sup>H NMR spectrum of DSS-Pt(dach)Cl<sub>2</sub> in DMSO-d<sub>6</sub>.

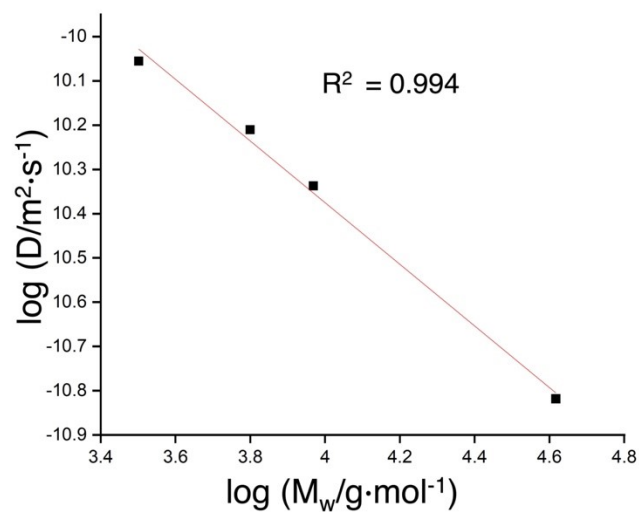

**Fig. S4.** Diffusion coefficients ( $D$ ) versus molecular weights of poly(ethylene glycol) determined by DOSY-NMR spectroscopy in DMSO- $d_6$ .

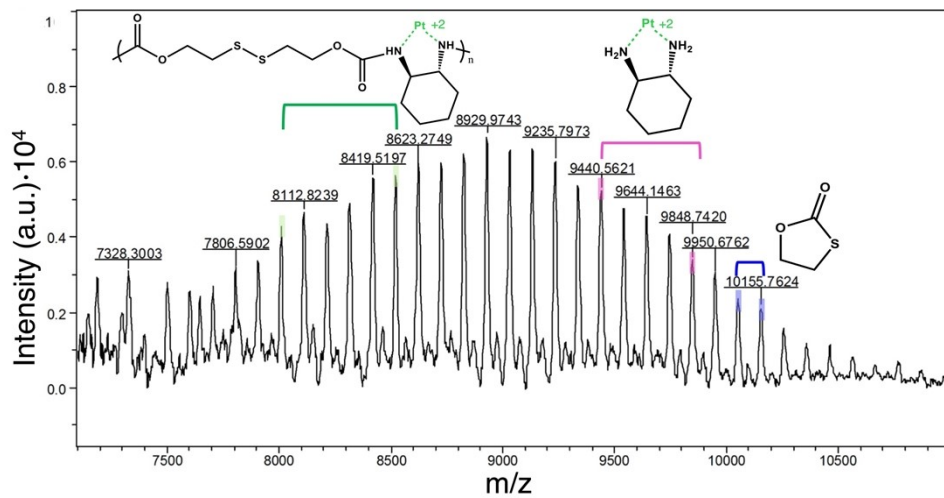

**Fig. S5.** MALDI-TOF mass spectrum of DSS-Pt(dach) $Cl_2$ . The  $m/z$  values represent the mass-to-charge ratios.

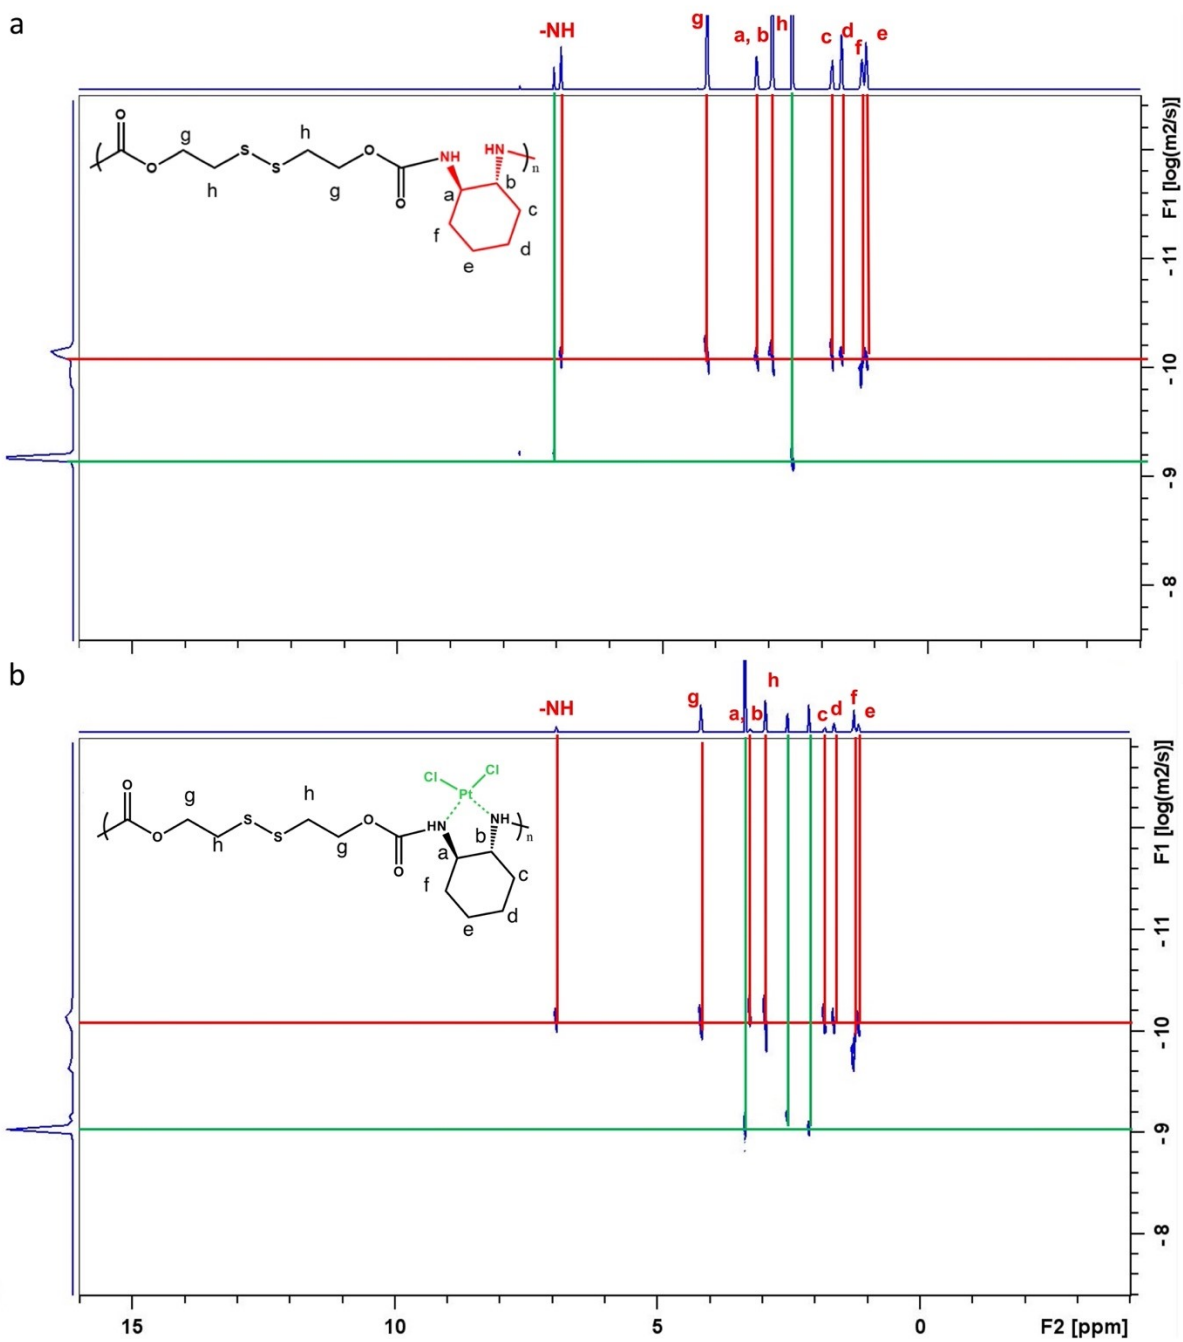

**Fig. S6.** 2D NMR-DOSY spectra of (a) DSS-dach and (b) DSS-Pt(dach)Cl<sub>2</sub> in DMSO-d<sub>6</sub>.

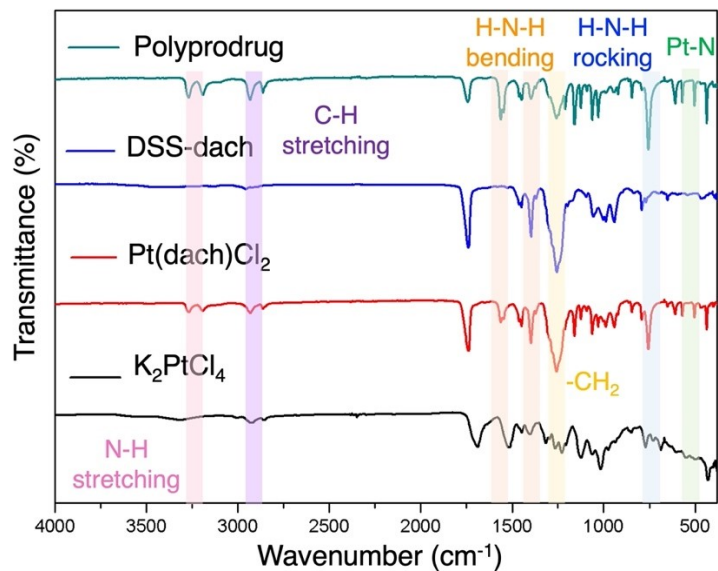

**Fig. S7.** FT-IR spectra of polyprodrug, DSS-dach, Pt(dach)Cl<sub>2</sub>, and K<sub>2</sub>PtCl<sub>4</sub>.

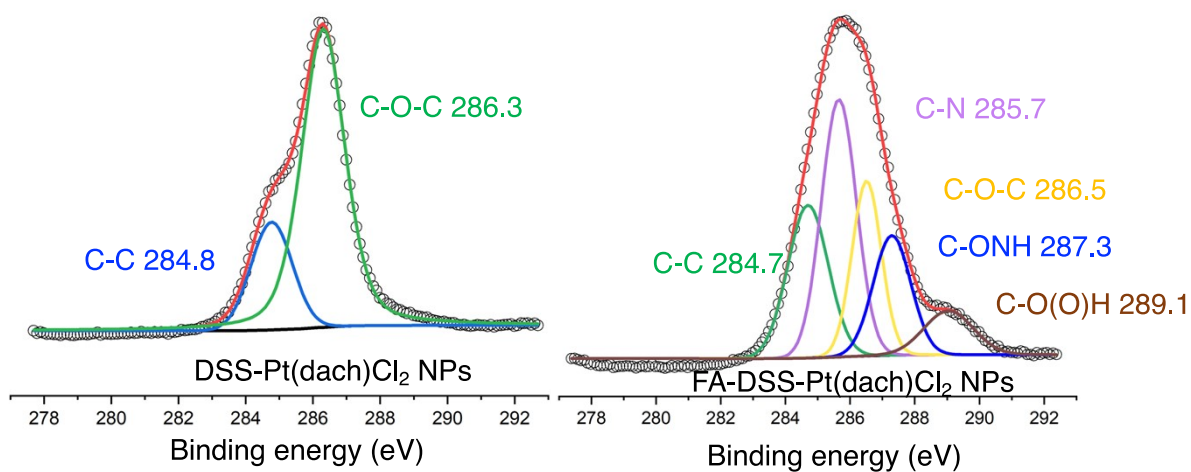

**Fig. S8.** C 1s XPS spectra of a) DSS-Pt(dach)Cl<sub>2</sub> NPs and b) FA-DSS-Pt(dach)Cl<sub>2</sub> NPs.

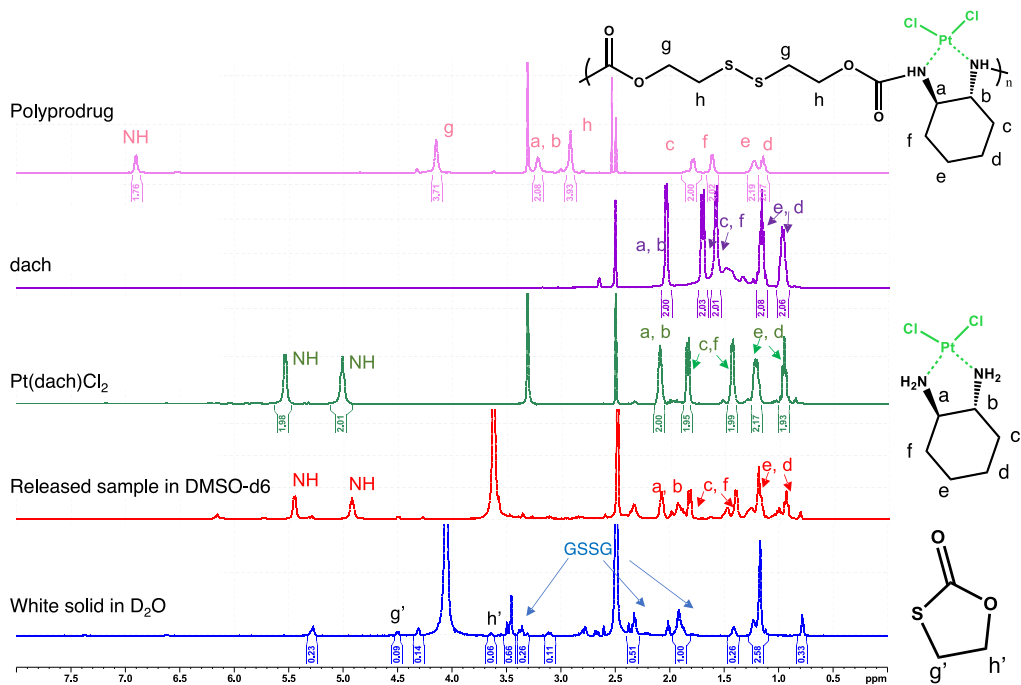

**Fig. S9.**  $^1\text{H}$  NMR spectra of polyprodrug, dach,  $\text{Pt}(\text{dach})\text{Cl}_2$ , and dried release medium after 72 h release in deuterated dimethyl sulfoxide ( $\text{DMSO-d}_6$ ) and in deuterated water ( $\text{D}_2\text{O}$ ).

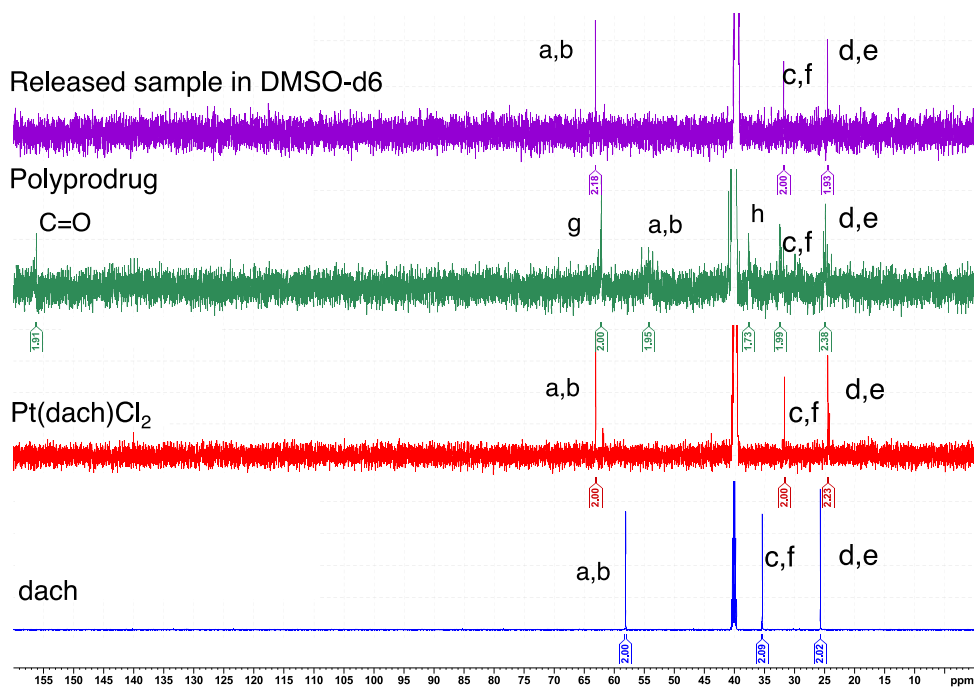

**Fig. S10.**  $^{13}\text{C}$  NMR spectra of the dried release medium after release for 72 h, polyprodrug,  $\text{Pt}(\text{dach})\text{Cl}_2$ , and dach in deuterated dimethyl sulfoxide ( $\text{DMSO-d}_6$ ).

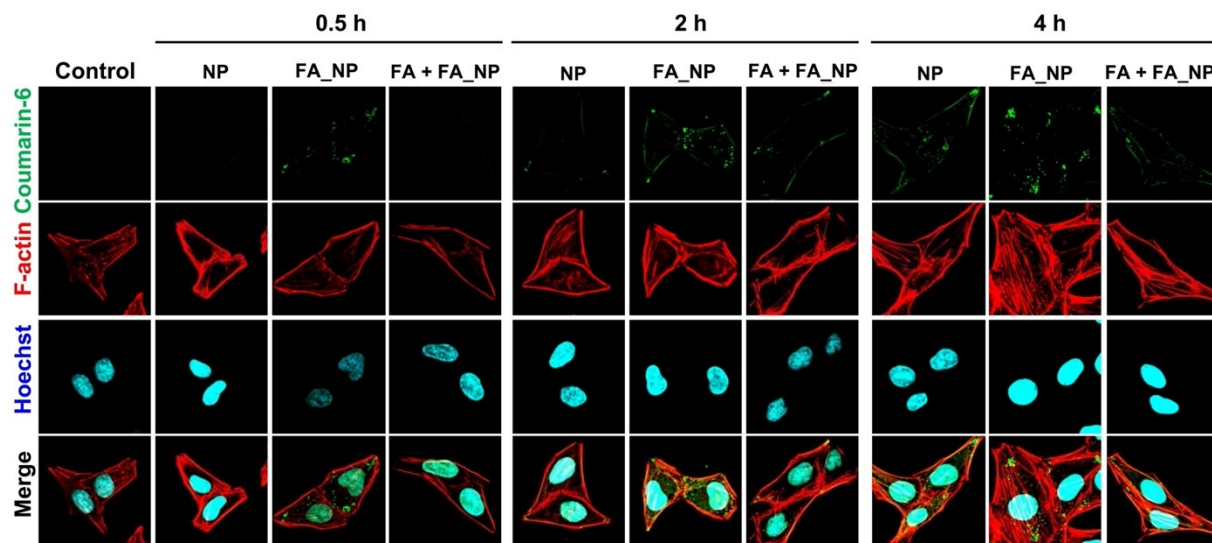

**Fig. S11.** Cellular uptake images of HeLa cells after 0.5, 2, and 4 h of incubation with DSS-Pt(dach)Cl<sub>2</sub> NPs (NP), FA-DSS-Pt(dach)Cl<sub>2</sub> NPs (FA\_NP), and FA-DSS-Pt(dach)Cl<sub>2</sub> NPs+FA (FA + FA\_NP). First row shows green stained coumarin-6 loaded nanoparticle; second row shows cell membrane stained red with F-actin; third row shows nuclei stained blue with Hoechst 33342 dye and fourth row shows overlay of all the three quadrants.

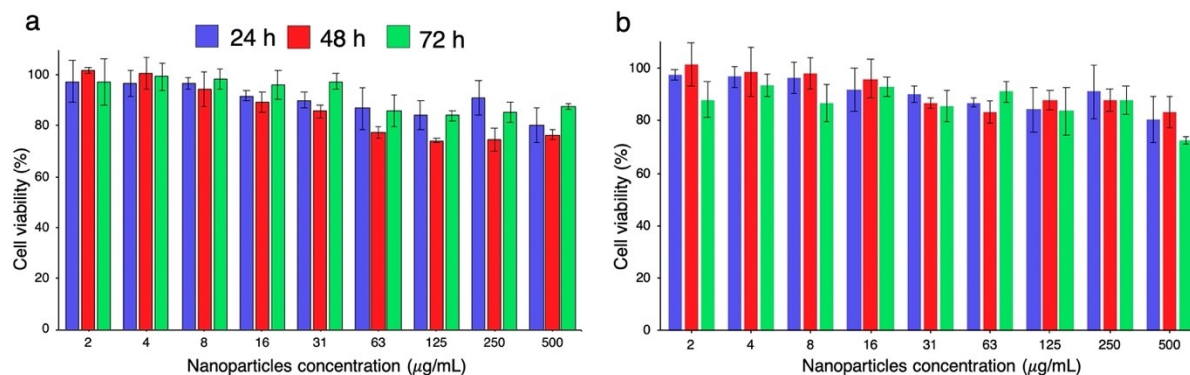

**Fig. S12.** Cytotoxicity of FA-DSS-dach NPs against (a) HeLa cells and (b) CRL2522 (fibroblast cells) after 24, 48, and 72 h of incubation.

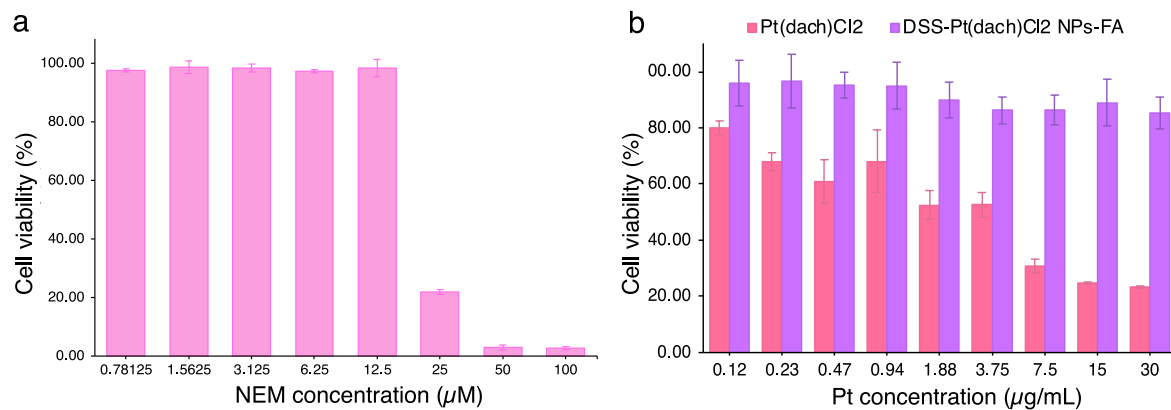

**Fig. S13.** (a) Viability of HeLa cells pretreated for 1 h with (a) different concentrations of *N*-ethylmaleimide (NEM) and subsequently incubated with Dulbecco's Modified Eagle Medium (DMEM) for 72 h (b) Viability of HeLa cells pretreated for 1 h with 12.5  $\mu\text{M}$  NEM and then treated with Pt(dach)Cl<sub>2</sub> or FA-DSS-Pt(dach)Cl<sub>2</sub> NPs for 72 h.



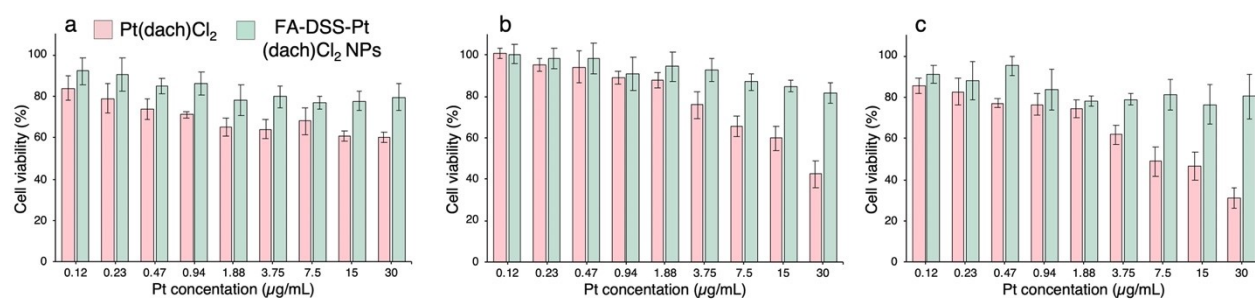

**Fig. S14.** Cytotoxicity of Pt(dach)Cl<sub>2</sub> and FA-DSS-Pt(dach)Cl<sub>2</sub> NPs against CRL2522 (fibroblast cells) after (a) 24, (b) 48, and (c) 72 h of incubation.
